# Supplementary material
Source: HighWire-hosted journal article supplement (https://adc.bmj.com/content/108/8/632)
Supplement: inline-supplementary-material-1 [file inline-supplementary-material-1.pdf]

## Supplemental file 2. Algorithm for classifying children at risk of serious infection

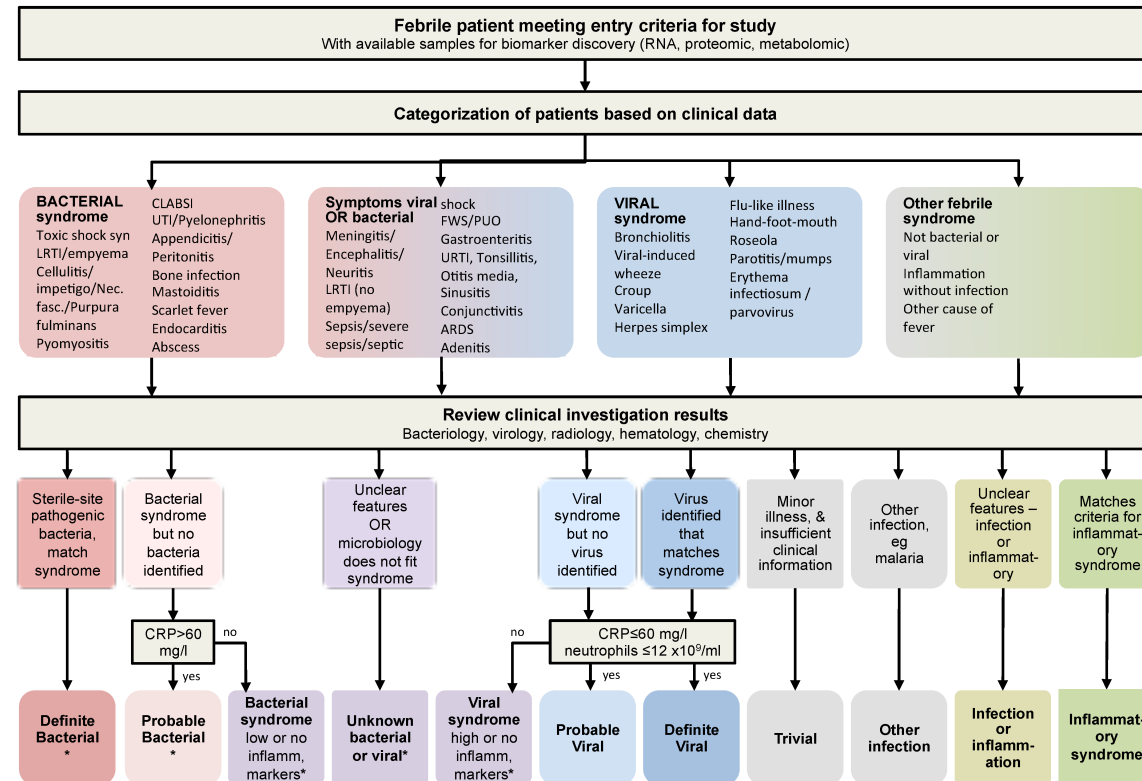

\*DB/PB/unknown bacterial or viral: patients CAN have identified viral co-infection

**Legend:**

Following discharge, clinical phenotypes were assigned after review of all available clinical and laboratory data including biochemistry, haematology, radiology and microbiology. CRP C-reactive protein
