# Supplementary material
Source: HighWire-hosted journal article supplement (https://adc.bmj.com/content/108/8/632)

Supplemental file 3. Number of children with fever of five days or more as a percentage of total number of febrile children included per study site and for each study period.

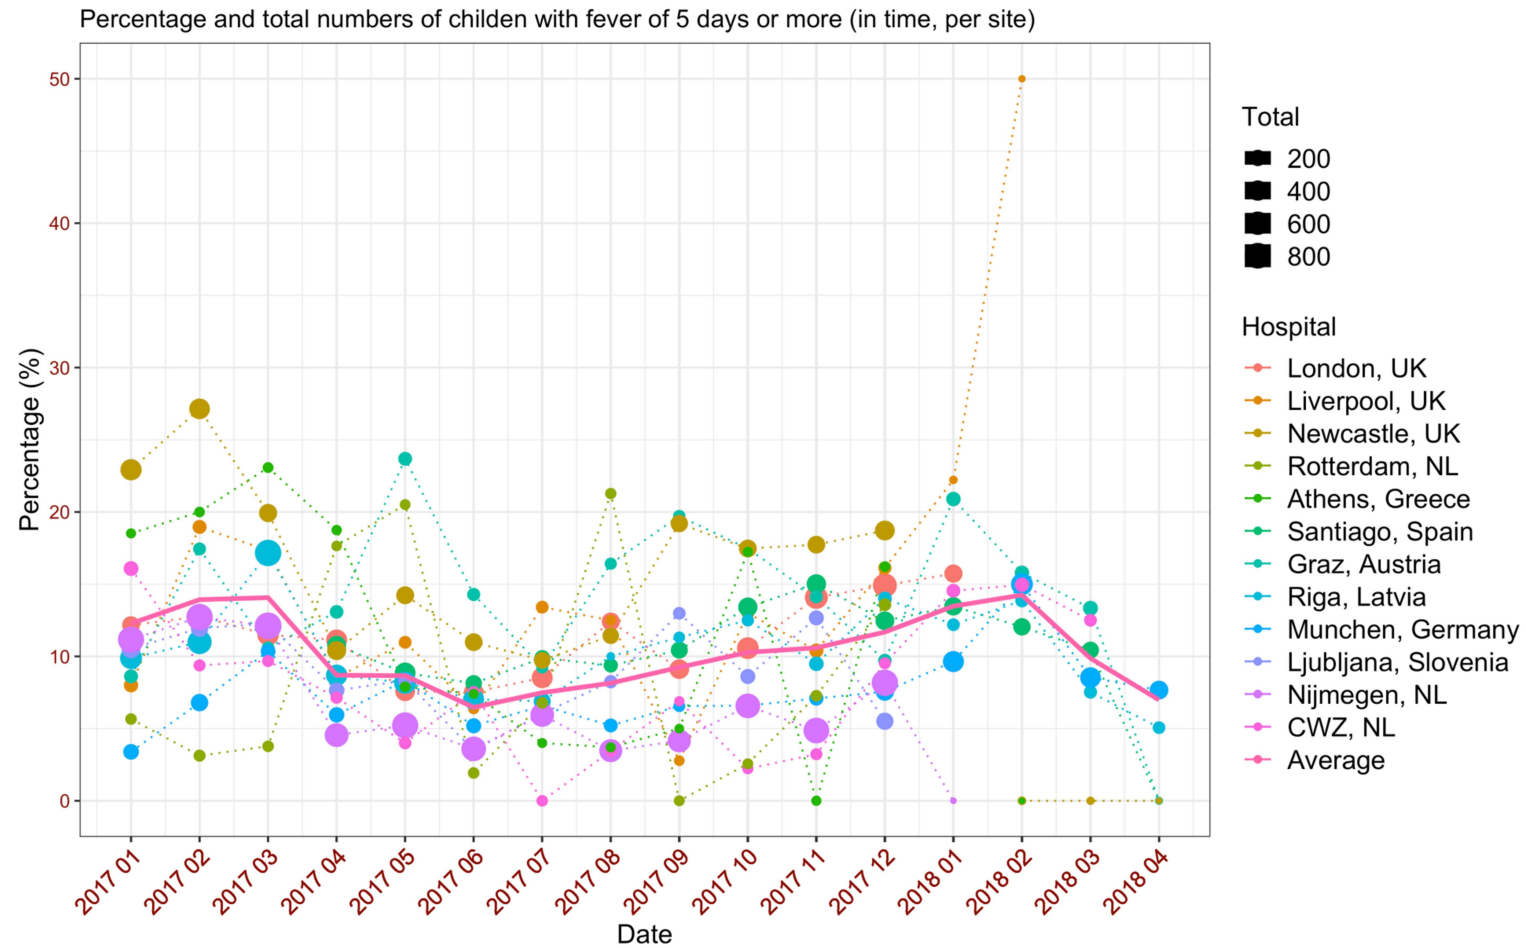

Supplement: inline-supplementary-material-2 [file inline-supplementary-material-2.pdf]
