# Supplementary material
Source: HighWire-hosted journal article supplement (https://adc.bmj.com/content/108/8/632)
Supplement: inline-supplementary-material-3 [file inline-supplementary-material-3.pdf]

Supplemental file 4. Type of infections for children with SBI in those with fever <5 days of fever and those ≥5 days

| Diagnosis – focus of infection | SBI                     | SBI                    |
|--------------------------------|-------------------------|------------------------|
|                                | fever <5 days<br>N=1812 | Fever ≥5 days<br>N=319 |
| Upper respiratory tract        | 0 (0%)                  | 0 (0%)                 |
| Lower respiratory tract        | 628 (35%)               | 173 (54%)              |
| Gastro-intestinal              | 273 (15%)               | 19 (6%)                |
| Urinary tract                  | 769 (42%)               | 111 (35%)              |
| Childhood exanthema            | 0 (0%)                  | 0 (0%)                 |
| Soft tissue or musculoskeletal | 37 (2%)                 | 4 (1%)                 |
| Sepsis or meningitis           | 105 (6%)                | 12 (4%)                |
| Undifferentiated fever         | 0 (0%)                  | 0 (0%)                 |
| Inflammatory or other          | 0 (0%)                  | 0 (0%)                 |

*Note: children with a confirmed invasive bacterial infection could be classified with another primary focus for infection than ‘sepsis or meningitis’*
