# Supplementary material
Source: HighWire-hosted journal article supplement (https://adc.bmj.com/content/108/8/632)
Supplement: inline-supplementary-material-4 [file inline-supplementary-material-4.pdf]

## Supplemental file 5. Positive and negative likelihood ratios of warning signs in children with fever &lt;5 days

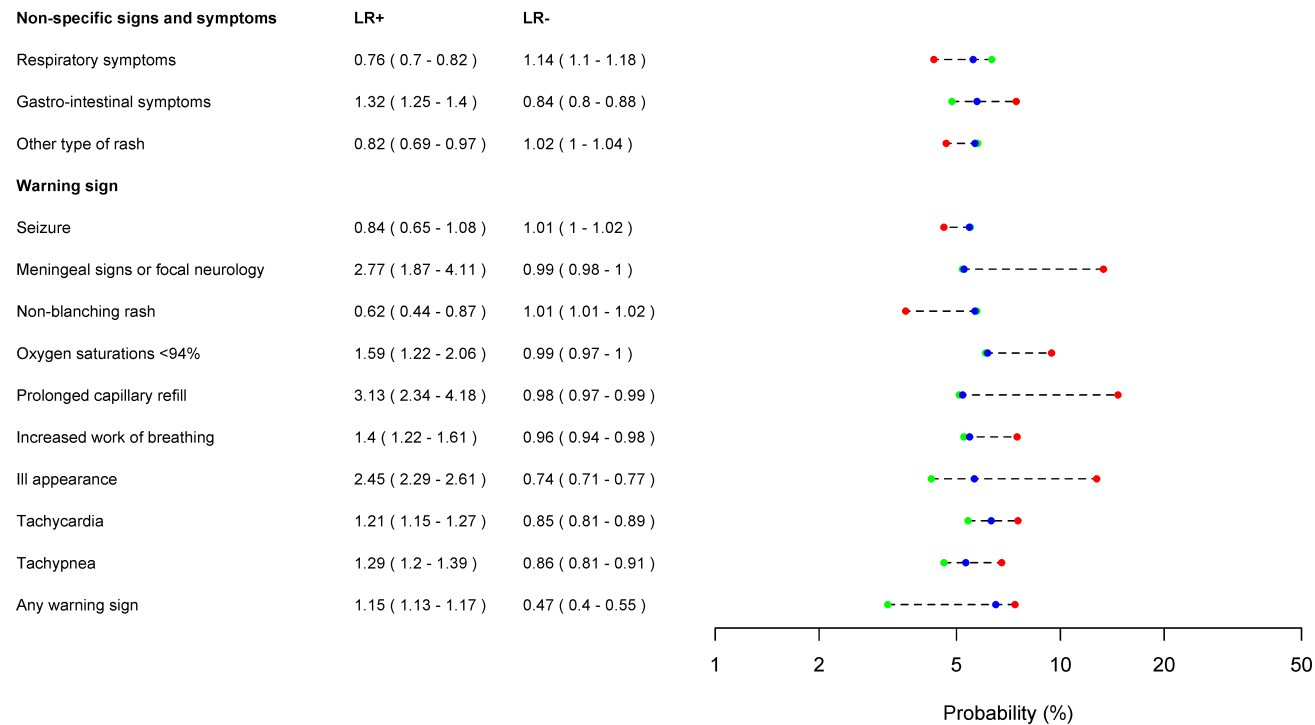**Legend:**

The change from pre-test probabilities (blue dots) to post-test probabilities using negative likelihood ratios (green dots; rule out value) and positive likelihood ratios (red dots; rule in value) for non-specific signs and symptoms, duration of fever, and clinical warning signs. Please note, the incidence of SBI varies based on number of available data for each of the predictor variables. The x-axis is depicted on a logarithmic scale.
