# Supplementary material
Source: HighWire-hosted journal article supplement (https://adc.bmj.com/content/108/8/632)
Supplement: inline-supplementary-material-6 [file inline-supplementary-material-6.pdf]

## Supplemental file 7. Other serious illness in children with fever for five days or more and their clinical characteristics

|                                 |           |
|---------------------------------|-----------|
| <b>Total</b>                    | 66 (1.7%) |
| Kawasaki Disease                | 21 (0.6%) |
| Inflammatory conditions other ^ | 28 (0.7%) |
| Malignancy                      | 4 (0.1%)  |
| Infection atypical^^            | 7 (0.2%)  |
| Other                           | 6 (0.2%)  |

^ Henoch-Schonlein purpura n=5, Juvenile idiopathic arthritis n=6, Systemic Lupus Erythematosus n=2, Auto-immune meningo-encephalitis n=2, Periodic fever syndromes n=3, Other n=9; ^^ malaria n=3, PCP n=1, oxyuriasis n=1, leishmaniasis n=1

|                                                                  |                        | <b>Kawasaki, n=21 (0.6%)</b> | <b>Inflammatory conditions, n=28 (0.7%)</b> |
|------------------------------------------------------------------|------------------------|------------------------------|---------------------------------------------|
| <b>Age</b>                                                       | Median (IQR)           | 2.23 (1.53-3.81)             | 6.66 (4.91-11.39)                           |
| <b>Sex</b>                                                       | Female, n (%)          | 8 (38%)                      | 14 (50%)                                    |
| <b>Previous visit to any health care provider in last 7 days</b> | N (%)                  | 18 (86%)                     | 14 (54%)                                    |
| <b>Referral</b>                                                  | N (%)                  | 19 (90%)                     | 19 (68%)                                    |
| <b>Comorbidity</b>                                               | N (%)                  | 3 (14%)                      | 8 (29%)                                     |
| <b>Triage urgency classification (MTS)</b>                       | Emergent - Very urgent | 3 (14%)                      | 1 (4%)                                      |
|                                                                  | Urgent                 | 5 (24%)                      | 9 (32%)                                     |
|                                                                  | Standard - Non-urgent  | 13 (62%)                     | 17 (61%)                                    |
| <b>Duration of fever</b>                                         | Days, median (IQR)     | 9 (5-14)                     | 7 (5-13)                                    |
| <b>Respiratory signs and symptoms</b>                            | Any                    | 6 (35%)                      | 6 (29%)                                     |
| <b>Gastro-intestinal signs and symptoms</b>                      | Any                    | 6 (38%)                      | 8 (35%)                                     |
| <b>Other type of rash<sup>1</sup></b>                            | Any                    | 18 (86%)                     | 9 (35%)                                     |
| <b>Ill appearance</b>                                            | N (%)                  | 9 (43%)                      | 4 (16%)                                     |

|                                           |                                                 |            |            |
|-------------------------------------------|-------------------------------------------------|------------|------------|
| <b>Tachypnoea (breaths/minute)</b>        | APLS thresholds, n(%)                           | 1 (11%)    | 3 (23%)    |
| <b>Tachycardia (beats/minute)</b>         | APLS thresholds, n(%)                           | 6 (30%)    | 4 (17%)    |
| <b>Prolonged capillary refill</b>         | >= 3 seconds, n(%)                              | 0 (0%)     | 0 (0%)     |
| <b>Oxygen saturations</b>                 | <94% O <sub>2</sub> , n(%)                      | 0 (0%)     | 0 (0%)     |
| <b>Level of consciousness</b>             | Decreased<br>(Verbal, Pain, Unresponsive), n(%) | 0 (0%)     | 1 (4%)     |
| <b>Increased work of breathing</b>        | N (%)                                           | 0 (0%)     | 0 (0%)     |
| <b>Non-blanching rash</b>                 | N (%)                                           | 1 (5%)     | 7 (27%)    |
| <b>Neurological signs</b>                 | N (%)                                           | 0 (0%)     | 0 (0%)     |
| <b>Seizures</b>                           | N (%)                                           | 0 (0%)     | 0 (0%)     |
| <b>C-reactive protein</b>                 | mg/L, Median (IQR)                              | 44 (25-70) | 34 (13-89) |
| <b>Laboratory testing at ED</b>           | Any, n(%)                                       | 20 (95%)   | 24 (86%)   |
| <b>Imaging at ED</b>                      | Any, n(%)                                       | 12 (57%)   | 13 (46%)   |
| <b>Immediate lifesaving interventions</b> | Any, n(%)                                       | 0 (0%)     | 1 (4%)     |
| <b>Antibiotics</b>                        | Any, n(%)                                       | 5 (25%)    | 5 (18%)    |
| <b>Disposition</b>                        | Discharge without follow-up                     | 0 (0%)     | 3 (11%)    |
|                                           | Discharge with follow-up                        | 0 (0%)     | 0 (0%)     |
|                                           | Admission <24 hours                             | 0 (0%)     | 14 (50%)   |
|                                           | Admission 24 hours or more                      | 20 (95%)   | 10 (36%)   |
|                                           | Admission, duration unknown                     | 1 (5%)     | 1 (4%)     |
|                                           | PICU                                            | 0 (0%)     | 0 (0%)     |

<sup>1</sup> This excludes any non-blanching rash including petechiae and purpurae

APLS Advanced paediatric life support; ED emergency department; IQR Interquartile range
